# Supplementary material
Source: PubMed Central journal article supplement (PMC1959508)

**Fig 1S**

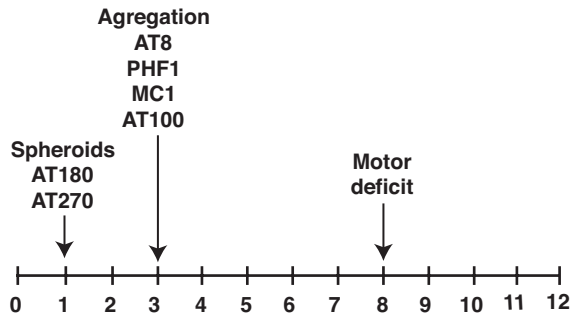

Supplement: amjpathol_ajpath.2007.070345_1.pdf [file amjpathol_ajpath.2007.070345_1.pdf]

# Fig 2S

## A

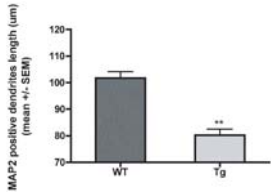

## B

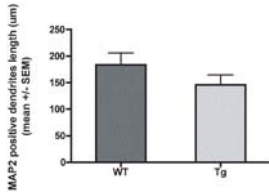

## C

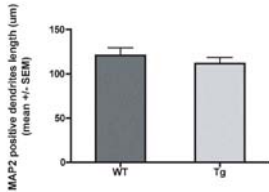

Supplement: amjpathol_ajpath.2007.070345_2.pdf [file amjpathol_ajpath.2007.070345_2.pdf]
